# Supplementary material
Source: PubMed Central journal article supplement (PMC4089371)
Supplement: milq0092-0250-SD1.pdf [file milq0092-0250-SD1.pdf]

## Online Appendix

### Supporting Information: Additional Methodological Details

#### Evidence Submission Documents

As explained in the main text, a standardized process that proposals for new primary legislation undergo in Scotland helps ensure that new laws are adequately scrutinized.<sup>1</sup> For the first stage of this scrutiny process, the Health and Sport Committee (which is made up of elected representatives in proportion to the membership of the Scottish parliament) is required to produce a report on the general principles of new legislation. This report recommends whether the parliament should allow the bill to progress further and subsequently helps inform parliamentary debate. Two different bills proposing the minimum unit pricing of alcohol in Scotland have been introduced, with the first, introduced in 2009, being unsuccessful. Given our interest in framing the policy debate, we analyzed the earliest public documents, produced by a range of policy stakeholders. As a result, the documents submitted as evidence were drawn from the first stage of the committee's consideration of the first, albeit unsuccessful, attempt to introduce minimum unit pricing (in the bill entitled alcohol, etc. [Scotland]).<sup>2</sup>

**Table A1. Participants Interviewed, by Sector**

| Sector   | Number of Interviewees |
|----------|------------------------|
| Academic | 8                      |
| Advocate | 7                      |

|               |    |
|---------------|----|
| Civil service | 10 |
| Industry      | 6  |
| Politician    | 5  |

### **Ensuring Participant Confidentiality**

The limited number of potential participants for this study increased the risk that the interviewees would be identified and thus also risked making recruitment difficult. In order to improve recruitment, we obtained informed consent not just for participating but also for recording the interviews (possible in nearly all cases), using quotations in publications and presentations (again available for most participants), and identifying the broad sector from which the participants were drawn (ie, politician, civil servant, researcher, advocate, and industry), an approach previously used by others.<sup>3</sup> After the interview, we marked those sections in the transcripts that were not to be quoted, to help minimize the risk of disclosure. We then gave the participants a copy of their transcript to review and asked them to make any modifications needed to ensure their anonymity (eg, indicating additional sections of the transcript that should not be quoted).

### **Reflexivity**

Qualitative interview data are a jointly constructed endeavor, arising from the interaction between interviewer and interviewee. A critical reflection of the interviewer's impact on the nature of the data collected can help in the analysis and be considered a mark of rigor. The researcher's perspective also may influence the interpretation of the data. In this appendix,

we briefly describe the lead researcher's background and position with respect to the topic of study. Reflexivity helps us better understand the impact that *we as researchers* have had on the findings of our research and also allows readers to consider for themselves the implications of our perspectives on our findings.

All the interviews were conducted by the lead author (Srinivasa Vittal Katikireddi), a public health specialty registrar. The interviewees were aware that the interviewer was trained as a medical doctor and therefore would be familiar with epidemiology. The interviewees also knew that our study was sponsored by the UK Medical Research Council and thus we would be interested in health. In addition, our research team has been developing plans to evaluate minimum unit pricing of alcohol, and some of the interviewees knew this before being interviewed (and this may have been a factor in their participation).

Given that we work in the field of public health and have an interest in population-based interventions, we are explicitly interested in gaining a better understanding of how public health practitioners and researchers can learn to better influence the development of policies. We therefore are aware that the focus of our findings could privilege the role of active agents and downplay the role of institutional and broader contextual factors. Although this article does examine the potential role of agency in the policy process, we paid close attention to structural factors in the analysis and are aware of the risks posed in ignoring these broader influences.

Considerable qualitative research in the health field focuses on exploring the perspectives of patients or other potentially vulnerable groups. However, the interviewees for this study can be considered "elite."<sup>4-6</sup> In other words, the traditional perspective in much qualitative research is that the interviewer holds power over the interviewee. In contrast, elite interviewees are characterized by power relationships that are either more equal or reversed, since many interviewees occupy high-level positions in their respective organizations. A

related issue is the relatively small size of the policy community that was asked to participate. This made ensuring confidentiality particularly important but also appeared to have facilitated the interviewees' participation if they had heard favorable comments about the research from others. While it has been argued that the distinction between "elite" interviews and other qualitative research has sometimes been overemphasized,<sup>4</sup> we looked carefully at these complex and variable power relations during our analysis. The impact of changes in the political context in which we conducted the interviews also added another layer of reflexive complexity.

## Overview of Evidence Submission Documents

### *Key*

We divided the stakeholders as being academic, health, voluntary, civil servant, government, public sector, trade rep(resentative), producer, off-trade, on-trade, supermarket, or individual.

Their positions on minimum unit pricing were based on the following categories:

Supportive: explicitly states that the stakeholder favors minimum unit pricing.

Against: explicitly states that the stakeholder opposes minimum unit pricing.

Neutral: presents both positive and negative statements regarding minimum unit pricing and does not explicitly adopt either of the above positions.

Unclear: presents no explicit statements regarding supportiveness and therefore does not reveal the stakeholder's position on minimum unit pricing.

Exempt: cannot express an explicit opinion regarding the stakeholder's support for minimum unit pricing because his or her organization precludes the stakeholder from doing so.

| <b>Ref.</b> | <b>Stakeholder</b>                               | <b>Stakeholder Type</b> | <b>Position</b> |
|-------------|--------------------------------------------------|-------------------------|-----------------|
| 1           | School of Health And Related Research, Sheffield | Academic                | Neutral         |
| 2           | SPICe                                            | Civil service           | Exempt          |
| 3           | Peter Anderson                                   | Academic                | Supportive      |
| 4           | Anne Ludbrook                                    | Academic                | Uncertain       |
| 5           | Scottish Government Overview                     | Civil service           | Exempt          |

| <b>Ref.</b> | <b>Stakeholder</b>                         | <b>Stakeholder Type</b> | <b>Position</b> |
|-------------|--------------------------------------------|-------------------------|-----------------|
| 6           | Centre for Economics and Business Research | Academic                | Against         |
| 7           | Royal Society of Edinburgh                 | Academic                | Supportive      |
| 8           | Salvation Army                             | Voluntary               | Supportive      |
| 9           | Children in Scotland                       | Voluntary               | Supportive      |
| 10          | Aberlour Child Care Trust                  | Voluntary               | Supportive      |
| 11          | NUS Scotland                               | Trade rep               | Supportive      |
| 12          | Youth Link Scotland                        | Voluntary               | Supportive      |
| 13          | BMA Scotland                               | Trade rep               | Supportive      |
| 14          | SHAAP                                      | Health                  | Supportive      |
| 15          | Faculty of Public Health                   | Health                  | Supportive      |
| 16          | Alcohol Focus Scotland                     | Voluntary               | Supportive      |
| 17          | Scottish Association for Mental Health     | Health                  | Supportive      |
| 18          | Whyte & Mackay                             | Producer                | Against         |
| 19          | Tennents Caledonian Breweries Ltd.         | Producer                | Supportive      |
| 20          | Scotch Whisky Association                  | Producer                | Against         |
| 21          | NACM (cider)                               | Producer                | Against         |
| 22          | Portman Group                              | Producer                | Against         |
| 23          | SIBA (independent brewers)                 | Producer                | Against         |
| 24          | Scottish Grocers' Federation               | Off-trade               | Against         |
| 25          | Scottish Beer and Pub Association          | Trade rep               | Against         |
| 26          | Scottish Licensed Trade Association        | On-trade                | Supportive      |
| 27          | NOCTIS                                     | On-trade                | Supportive      |

| <b>Ref.</b> | <b>Stakeholder</b>                                   | <b>Stakeholder Type</b> | <b>Position</b> |
|-------------|------------------------------------------------------|-------------------------|-----------------|
| 28          | Consumer Focus Scotland                              | Voluntary               | Supportive      |
| 29          | Asda                                                 | Supermarket             | Against         |
| 30          | Sainsbury                                            | Supermarket             | Against         |
| 31          | Cooperative supermarket                              | Supermarket             | Against         |
| 32          | Morrisons                                            | Supermarket             | Against         |
| 33          | Tesco                                                | Supermarket             | Unclear         |
| 34          | Association of the Chief Police Officers of Scotland | Trade rep               | Supportive      |
| 35          | City of Edinburgh Council Licensing Standards        | Public sector           | Unclear         |
| 36          | W Dunbartonshire Licensing Forum                     | Public sector           | Supportive      |
| 37          | Glasgow City Council Licensing Board                 | Public sector           | Unclear         |
| 38          | Law Society of Scotland                              | Academic                | Neutral         |
| 39          | Office of Fair Trading                               | Civil service           | Neutral         |
| 40          | Canadian Centre for Substance Abuse                  | Health                  | Neutral         |
| 41          | BAC Canada Brewers                                   | Trade rep               | Neutral         |
| 42          | Alcohol and Gaming Commission of Ontario             | Public sector           | Neutral         |
| 43          | Liquor Control Board of Ontario                      | Public sector           | Neutral         |
| 44          | Centre for Addictions Research of British Columbia   | Academic                | Supportive      |
| 45          | Alberta Gaming and Liquor Commission                 | Public sector           | Neutral         |
| 46          | Molson Coors UK                                      | Producer                | Supportive      |
| 47          | Scottish Government, Nicola Sturgeon                 | Government              | Supportive      |
| 48          | Aberdeen City Alcohol & Drugs                        | Public sector           | Supportive      |
| 49          | Aberdeen City Council                                | Public sector           | Neutral         |

| <b>Ref.</b> | <b>Stakeholder</b>                      | <b>Stakeholder Type</b> | <b>Position</b> |
|-------------|-----------------------------------------|-------------------------|-----------------|
| 50          | North Aberdeenshire Licensing Board     | Public sector           | Supportive      |
| 51          | Aberdeenshire Alcohol Drugs Partnership | Health                  | Supportive      |
| 52          | Academy of Royal Medical Colleges       | Health                  | Supportive      |
| 53          | Action for Children Scotland            | Voluntary               | Neutral         |
| 54          | Addiction Recovery Training Services    | Health                  | Against         |
| 55          | Association of Directors of Social Work | Public sector           | Supportive      |
| 56          | Alcohol Concern                         | Voluntary               | Supportive      |
| 57          | Alcohol Health Alliance                 | Health                  | Supportive      |
| 58          | Angus Alcohol and Drugs Partnership     | Public sector           | Supportive      |
| 59          | Dr. E.M. Armstrong (former CMO)         | Health                  | Supportive      |
| 60          | Barnados Scotland                       | Voluntary               | Supportive      |
| 61          | British Institute of Innkeeping         | On-trade                | Unclear         |
| 62          | Broadway Convenience Store              | Off-trade               | Supportive      |
| 63          | Breakthrough Breast Ca{{correct?}}      | Voluntary               | Supportive      |
| 64          | British Hospitality Association         | Trade rep               | Unclear         |
| 65          | Campaign for Real Ale                   | Trade rep               | Supportive      |
| 66          | Castle Leisure Group                    | On-trade                | Supportive      |
| 67          | CBI Scotland                            | Trade rep               | Against         |
| 68          | Children in Scotland                    | Voluntary               | Supportive      |
| 69          | Chivas Brothers Ltd.                    | Producer                | Supportive      |
| 70          | Church of Scotland                      | Voluntary               | Supportive      |
| 71          | City of Edinburgh Licensing Board       | Public sector           | Supportive      |



| <b>Ref.</b> | <b>Stakeholder</b>                                  | <b>Stakeholder Type</b> | <b>Position</b> |
|-------------|-----------------------------------------------------|-------------------------|-----------------|
| 72          | Clackmannshire Licensing Board                      | Public sector           | Against         |
| 73          | Dr. Forrester Cockburn                              | Health                  | Unclear         |
| 74          | Comhairle Nan Eilean Siar (Western Isles Council)   | Public sector           | Supportive      |
| 75          | Counselling and Psychotherapy in Scotland           | Trade rep               | Neutral         |
| 76          | Convention of Scottish Local Authorities            | Public sector           | Unclear         |
| 77          | Diageo                                              | Producer                | Against         |
| 78          | Hugh Donnelly                                       | Individual              | Against         |
| 79          | Dumbarton East and Central Community Council        | Public sector           | Supportive      |
| 80          | Dumfries and Galloway Alcohol and Drugs Partnership | Health                  | Supportive      |
| 81          | Dundee City Licensing Board                         | Public sector           | Supportive      |
| 82          | East Ayrshire Alcohol and Drugs Partnership         | Health                  | Supportive      |
| 83          | East Ayrshire Licensing Board                       | Public sector           | Supportive      |
| 84          | East Dunbartonshire Alcohol and Drugs Partnership   | Health                  | Supportive      |
| 85          | East Lothian Licensing Board                        | Public sector           | Unclear         |
| 86          | East Renfrewshire Licensing Board                   | Public sector           | Against         |
| 87          | Edrington Group                                     | Producer                | Against         |
| 88          | Falkirk Council                                     | Public sector           | Supportive      |
| 89          | Fife Council                                        | Public sector           | Supportive      |
| 90          | Fed Small Bus                                       | Trade rep               | Unclear         |
| 91          | Gin and Vodka Association                           | Producer                | Against         |
| 92          | General Medical Council                             | Trade rep               | Neutral         |

| <b>Ref.</b> | <b>Stakeholder</b>                              | <b>Stakeholder Type</b> | <b>Position</b> |
|-------------|-------------------------------------------------|-------------------------|-----------------|
| 93          | David Harrell                                   | Individual              | Supportive      |
| 94          | Health Protection Scotland                      | Health                  | Neutral         |
| 95          | Heineken                                        | Producer                | Against         |
| 96          | Highland Alcohol and Drugs Partnership          | Health                  | Supportive      |
| 97          | Highland Licensing Board                        | Public sector           | Neutral         |
| 98          | Home Safety Scotland                            | Voluntary               | Unclear         |
| 99          | Institute for Alcohol Studies                   | Voluntary               | Supportive      |
| 100         | The International Coalition Against Prohibition | Voluntary               | Against         |
| 101         | Inverclyde Council                              | Public sector           | Supportive      |
| 102         | James Kelly                                     | Individual              | Against         |
| 103         | Lanarkshire Alcohol and Drugs Partnership       | Health                  | Supportive      |
| 104         | Leslie Logan                                    | Individual              | Supportive      |
| 105         | Dr. Macleod                                     | Health                  | Unclear         |
| 106         | Mohamed Mashaal                                 | Individual              | Supportive      |
| 107         | Medical Research Council                        | Academic                | Neutral         |
| 108         | Mid Lothian Alcohol and Drugs Partnership       | Health                  | Unclear         |
| 109         | Mitchell's & Butlers                            | On-trade                | Unclear         |
| 110         | Moray Alcohol and Drugs Partnership             | Health                  | Supportive      |
| 111         | Moray Licensing Board                           | Public sector           | Unclear         |
| 112         | Colin Murray                                    | Individual              | Against         |
| 113         | NHS Ayrshire & Arran                            | Health                  | Supportive      |
| 114         | NHS Ayrshire Clinical Forum                     | Health                  | Supportive      |

| <b>Ref.</b> | <b>Stakeholder</b>                            | <b>Stakeholder Type</b> | <b>Position</b> |
|-------------|-----------------------------------------------|-------------------------|-----------------|
| 115         | NHS Borders                                   | Health                  | Supportive      |
| 116         | NHS Borders & South Borders Council           | Health                  | Supportive      |
| 117         | NHS Borders Health Improvement Team           | Health                  | Supportive      |
| 118         | NHS Forth Valley                              | Health                  | Supportive      |
| 119         | NHS Grampian                                  | Health                  | Supportive      |
| 120         | NHS Greater Glasgow and Clyde                 | Health                  | Supportive      |
| 121         | NHS Health Scotland                           | Health                  | Supportive      |
| 122         | NHS Highland                                  | Health                  | Supportive      |
| 123         | NHS Lanarkshire                               | Health                  | Supportive      |
| 124         | NHS Lothian Alcohol and Drugs Partnership     | Health                  | Supportive      |
| 125         | NHS Lothian                                   | Health                  | Supportive      |
| 126         | NHS Orkney                                    | Health                  | Supportive      |
| 127         | NHS Orkney Chair                              | Health                  | Unclear         |
| 128         | NHS Tayside                                   | Health                  | Supportive      |
| 129         | NHS Western Isles                             | Health                  | Supportive      |
| 130         | NOCTIS <sup>a</sup>                           | Trade rep               | Supportive      |
| 131         | North Aberdeenshire Licensing Forum           | Health                  | Supportive      |
| 132         | North Ayrshire Alcohol and Drugs Partnership  | Health                  | Supportive      |
| 133         | North Lanarkshire Council, Sports             | Public sector           | Unclear         |
| 134         | Orkney Islands Licensing Board                | Public sector           | Supportive      |
| 135         | Perth & Kinross Alcohol and Drugs Partnership | Health                  | Supportive      |
| 136         | Perth & Kinross Council                       | Public sector           | Supportive      |

| <b>Ref.</b> | <b>Stakeholder</b>                                  | <b>Stakeholder Type</b> | <b>Position</b> |
|-------------|-----------------------------------------------------|-------------------------|-----------------|
| 137         | Prevention Research Centre                          | Academic                | Unclear         |
| 138         | Poverty Truth Commission                            | Voluntary               | Supportive      |
| 139         | Church of Scotland, Presbytery of Edinburgh         | Voluntary               | Supportive      |
| 140         | Queen Margaret University                           | Academic                | Unclear         |
| 141         | Chris Record                                        | Health                  | Unclear         |
| 142         | Renfrewshire Council                                | Public sector           | Supportive      |
| 143         | Renfrewshire Licensing Forum                        | Public sector           | Unclear         |
| 144         | Royal College of General Practitioners Scotland     | Health                  | Supportive      |
| 145         | Royal College of Nurses                             | Health                  | Supportive      |
| 146         | Royal College of Physicians                         | Health                  | Supportive      |
| 147         | Royal College of Physicians and Surgeons of Glasgow | Health                  | Unclear         |
| 148         | Royal College of Physicians of Edinburgh            | Health                  | Supportive      |
| 149         | Roy College of Psychiatrists Scotland               | Health                  | Supportive      |
| 150         | Roy College of Surgeons of Edinburgh                | Health                  | Supportive      |
| 151         | Royal Infirmary of Edinburgh                        | Health                  | Supportive      |
| 152         | SabMiller                                           | Producer                | Against         |
| 153         | Scottish Patients' Association                      | Health                  | Supportive      |
| 154         | Scottish Commissioner for Children and Young People | Public sector           | Supportive      |
| 155         | Scottish Ambulance Service                          | Health                  | Supportive      |
| 156         | Scottish Association of Alcohol and Drug Teams      | Health                  | Supportive      |

| <b>Ref.</b> | <b>Stakeholder</b>                           | <b>Stakeholder Type</b> | <b>Position</b> |
|-------------|----------------------------------------------|-------------------------|-----------------|
| 157         | Glasgow Centre for Study of Violence         | Academic                | Unclear         |
| 158         | Scottish Centre for Development and Industry | Trade rep               | Against         |
| 159         | Scottish Episcopal Church                    | Voluntary               | Supportive      |
| 160         | Scottish Police Federation                   | Trade rep               | Supportive      |
| 161         | Scottish Retail Consortium                   | Off-trade               | Against         |
| 162         | Scottish Women's Convention                  | Voluntary               | Unclear         |
| 163         | Scottish Youth Commission on Alcohol         | Voluntary               | Supportive      |
| 164         | Scottish Youth Parliament                    | Voluntary               | Supportive      |
| 165         | Elizabeth Shelby                             | Individual              | Supportive      |
| 166         | Nick Sheron                                  | Health                  | Unclear         |
| 167         | Silverton and Overtoun Community Council     | Public sector           | Supportive      |
| 168         | South Aberdeenshire Licensing Forum          | Public sector           | Supportive      |
| 169         | South Ayrshire Alcohol and Drugs Partnership | Health                  | Supportive      |
| 170         | South Ayrshire Licensing Board               | Public sector           | Supportive      |
| 171         | John and Ann Steer                           | Individual              | Supportive      |
| 172         | Eleanor Steiner                              | Individual              | Supportive      |
| 173         | Jonathan Stewart                             | Individual              | Supportive      |
| 174         | UK Advertising Standards Agency              | Civil service           | Neutral         |
| 175         | Unison Scotland                              | Trade rep               | Neutral         |
| 176         | University of Aberdeen                       | Academic                | Supportive      |
| 177         | University of Stirling                       | Academic                | Supportive      |
| 178         | University of the West of England            | Academic                | Supportive      |

| <b>Ref.</b> | <b>Stakeholder</b>                                 | <b>Stakeholder Type</b> | <b>Position</b> |
|-------------|----------------------------------------------------|-------------------------|-----------------|
| 179         | University of the West of Scotland                 | Academic                | Unclear         |
| 180         | Violence Reduction Unit Scotland                   | Academic                | Unclear         |
| 181         | West Dunbartonshire Council                        | Public sector           | Unclear         |
| 182         | West Lothian Council                               | Public sector           | Supportive      |
| 183         | West Lothian Licensing Board                       | Public sector           | Neutral         |
| 184         | West Lothian Tobacco Alcohol and Drugs Partnership | Health                  | Supportive      |
| 185         | West Isles Licensing Board                         | Public sector           | Supportive      |
| 186         | Gillian Wray                                       | Individual              | Neutral         |

<sup>a</sup>Duplicate submission by stakeholder.

## References

1. Scottish Parliament. Annex E: stages in the passage of a public bill. Edinburgh: Scottish Parliament; 2007.
2. Health and Sport Committee. 5th report, 2010 (sess. 3). Stage 1 report on the alcohol etc. (Scotland) bill. Vol. 2: Evidence. Annexe B: Oral evidence and associated written evidence; 2010.  
<http://www.scottish.parliament.uk/parliamentarybusiness/CurrentCommittees/48155.aspx>. Accessed August 22, 2011.
3. Smith KE. *Health Inequalities in Scotland and England: The Translation of Ideas between Research and Policy*. Edinburgh: University of Edinburgh; 2008.

4. Smith KE. Problematizing power relations in “elite” interviews. *Geoforum*. 2006;37(4):643-653.
5. Desmond M. Methodological challenges posed in studying an elite in the field. *Area*. 2004;36(3):262-269.
6. Neal S, McLaughlin E. Researching up? Interviews, emotionality and policy-making elites. *J. Soc. Policy*. 2009;38(04):689-707.
